# Supplementary material for: Self-Assembled 3D ZnO Porous Structures with Exposed Reactive {0001} Facets and Their Enhanced Gas Sensitivity
Source: Sensors (Basel). 2013 Jul 2;13(7):8445–60. doi: 10.3390/s130708445 (PMC3758604; doi:10.3390/s130708445)

Supporting Information

## Self-Assembled 3D ZnO Porous Structures with Exposed Reactive {0001} Facets and Their Enhanced Gas Sensitivity. *Sensors* 2013, 14, 8445-8460

Jin Chang <sup>1</sup>, Muhammad Z. Ahmad <sup>2</sup>, Wojtek Wlodarski <sup>2</sup> and Eric R. Waclawik <sup>1,\*</sup>

<sup>1</sup> School of Chemistry, Physics & Mechanical Engineering, QUT, Brisbane, QLD 4000, Australia; E-Mail: cj4566@gmail.com

<sup>2</sup> School of Electrical & Computer Engineering, RMIT University, Melbourne, VIC 3000, Australia; E-Mails: zamharir@gmail.com (M.Z.A.); ww@rmit.edu.au (W.W.)

\* Author to whom correspondence should be addressed; E-Mail: e.waclawik@qut.edu.au; Tel.: +61-7-3138-25791; Fax: +61-7-3138-1804.

**Figure S1.** FE-SEM image of ZnO sample F1.

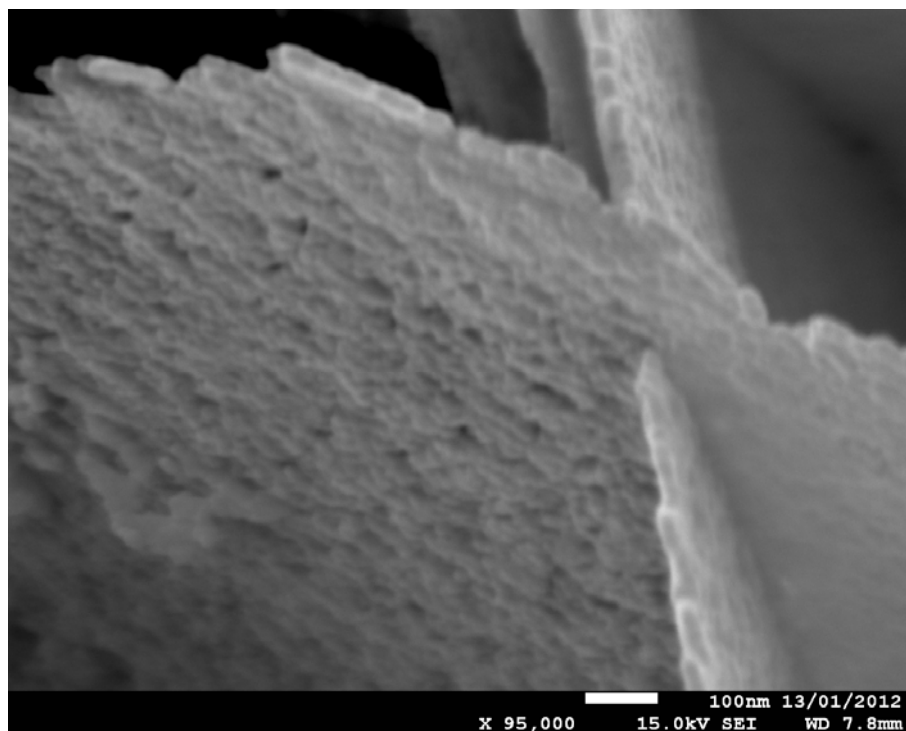

Supplement: Supplementary File 1 — Supporting Information (PDF, 255 KB) [file sensors-13-08445-s001.pdf]
